# Supplementary material for: Non-covalent polymerisation in the solid state: halogen–halogenvs. methyl–methyl interactions in the complexes of 2,4-di(2-pyridyl)-1,3,5-triazine ligands
Source: Royal Society of Chemistry journal article supplement (doi:10.1039/b613883g), 2006-11-24
Supplement: b613883g.pdf [file b613883g.pdf]

Table S1. Short Br contacts observed in complexes **1a-d** (centroid distances indicated by letter, edge contacts indicated by atom number and atom contacts indicated by name).

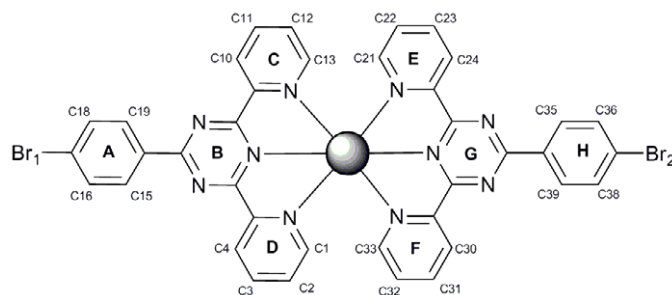

|              | <b>1a</b>          | <b>1c</b>                  | <b>1d</b>                  | <b>1d'</b>        |
|--------------|--------------------|----------------------------|----------------------------|-------------------|
|              | Bond distances (Å) |                            |                            |                   |
| Br-Br        | 3.45               | 5.99                       | 6.00                       | 3.33              |
| Br1 contacts | 3.90 (C)           | 3.81 (C23)                 | 3.95 (C32)                 | 3.87 (C)          |
|              | 3.93 (D)           | 3.50 (C, MeCN)             | 3.43 (C, MeCN)             | 3.94 (D)          |
|              | 3.66 (C1)          | 3.15 (F, PF <sub>6</sub> ) | 3.07 (F, PF <sub>6</sub> ) | 3.82 (C13)        |
|              |                    | 3.71 (C12)                 | 3.71 (C2)                  | 3.59 (O, acetone) |
| Br2 contacts |                    | 3.99 (C)                   | 3.94 (F)                   |                   |
|              |                    | 3.88 (C15)                 | 3.86 (C19)                 |                   |
|              |                    | 3.34 (F, PF <sub>6</sub> ) | 3.34 (F, PF <sub>6</sub> ) |                   |
|              |                    | 3.67 (C22)                 | 3.50 (C21)                 |                   |

Table S2. Short Me contacts observed in complexes **1a-d** (centroid distances indicated by letter, edge contacts indicated by atom number and atom contacts indicated by name).

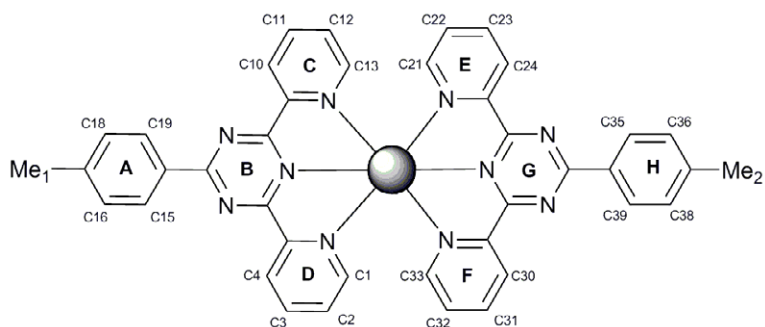

|              | <b>1a</b>          | <b>1b</b>                  | <b>1c</b>                  | <b>1d</b>                  |
|--------------|--------------------|----------------------------|----------------------------|----------------------------|
|              | Bond distances (Å) |                            |                            |                            |
| Me-Me        | 6.22               | 5.52                       | 5.49                       | 5.64                       |
| Me1 contacts | 3.59 (C30)         | 3.27 (F, PF <sub>6</sub> ) | 3.27 (F, PF <sub>6</sub> ) | 3.31 (F, PF <sub>6</sub> ) |
|              | 3.82 (N10)         | 3.85 (C)                   | 3.87 (C)                   | 3.90 (C)                   |
|              | 3.59 (C30)         |                            |                            |                            |
| Me2 contacts | 3.68 (C19)         |                            |                            |                            |
